# Supplementary material for: Speciation and the developmental alarm clock
Source: eLife. 2020 Sep 9;9:e56276. doi: 10.7554/eLife.56276 (PMC7481004; doi:10.7554/eLife.56276)
Supplement: Supplementary file 1. [file elife-56276-supp1.xlsx]

## Sheet: by study
Organism	Taxonomic group	Developmental period	Type of data	Inter-species comparison	Comparative analysis	Divergence feature	Reference
Aedes aegypti	Arthropoda	All ontogeny	transcriptome	intraspecific	N	NA	Akbari, O.S., Antoshechkin, I., Amrhein, H., Williams, B., Diloreto, R., Sandler, J., and Hay, B.A. (2013). The developmental transcriptome of the mosquito Aedes aegypti, an invasive species and major arbovirus vector. G3, 1493–1509.
Drosophila melanogaster	Arthropoda	All ontogeny	transcriptome	intraspecific	N	NA	Arbeitman, M.N., Furlong, E.E.M., Imam, F., Johnson, E., Null, B.H., Baker, B.S., Krasnow, M.A., Scott, M.P., Davis, R.W., and White, K.P. (2002). Gene expression during the life cycle of Drosophila melanogaster. Science 297, 2270–2275.
Sea biscuits (Clypeaster)	Echinodermata	Unfertilized egg - 8 armed larvae	transcriptome	C. subdepressus, C. rosaceus	Y	Transcriptome expression	Armstrong, A.F., and Grosberg, R.K. (2018). The developmental transcriptomes of two sea biscuit species with differing larval types. BMC Genomics 19, 368.
Ciona intestinalis	Chordata	All ontogeny	transcriptome	intraspecific	N	NA	Azumi, K., Sabau, S.V., Fujie, M., Usami, T., Koyanagi, R., Kawashima, T., Fujiwara, S., Ogasawara, M., Satake, M., Nonaka, M., et al. (2007). Gene expression profile during the life cycle of the urochordate Ciona intestinalis. Dev Biol 308, 572–582.
Atlantic Halibut (Hippoglossus hippoglossus)	Chordata	Embryo - Larva (3 stages)	transcriptome	intraspecific	N	NA	Bai, J., Solberg, C., Fernandes, J.M.O., and Johnston, I.A. (2007). Profiling of maternal and developmental-stage specific mRNA transcripts in Atlantic halibut Hippoglossus hippoglossus. Gene 386, 202–210.
Xenopus laevis	Chordata	All ontogeny	transcriptome	intraspecific	N	NA	Baldessari, D., Shin, Y., Krebs, O., König, R., Koide, T., Vinayagam, A., Fenger, U., Mochii, M., Terasaka, C., Kitayama, A., et al. (2005). Global gene expression profiling and cluster analysis in Xenopus laevis. Mech Develop 122, 441–475.
Fish	Chordata	Early embryogenesis	transcriptome	T. nigroviridis, D. rerio	Y	Transcriptome expression	Basu, S., Hadzhiev, Y., Petrosino, G., Nepal, C., Gehrig, J., Armant, O., Ferg, M., Strahle, U., Sanges, R., and Müller, F. (2016). The Tetraodon nigroviridis reference transcriptome: developmental transition, length retention and microsynteny of long non-coding RNAs in a compact vertebrate genome. Sci Rep 6, 33210.
Drosophila melanogaster	Arthropoda	All ontogeny	promoter profiling	intraspecific	N	NA	Batut, P., Dobin, A., Plessy, C., Carninci, P., and Gingeras, T.R. (2013). High-fidelity promoter profiling reveals widespread alternative promoter usage and transposon-driven developmental gene expression. Genome Res 23, 169–180.
Caenorhabditis elegans	Nematoda	Pseudo cleavage - 190 cell	transcriptome	intraspecific	N	NA	Baugh, L.R., Hill, A.A., Slonim, D.K., Brown, E.L., and Hunter, C.P. (2003). Composition and dynamics of the Caenorhabditis elegans early embryonic transcriptome. Development 130, 889–900.
Drosophila melanogaster	Arthropoda	Embryogenesis 1hr post laying - 20hr	proteome	intraspecific	N	NA	Becker, K., Bluhm, A., Casas-Vila, N., Dinges, N., Dejung, M., Sayols, S., Kreutz, C., Roignant, J.-Y., Butter, F., and Legewie, S. (2018). Quantifying post-transcriptional regulation in the development of Drosophila melanogaster. Nat Commun 9, 4970.
Cricket (Gryllus rubens)	Arthropoda	All ontogeny (7 stages)	transcriptome	intraspecific	N	NA	Berdan, E.L., Blankers, T., Waurick, I., Mazzoni, C.J., and Mayer, F. (2016). A genes eye view of ontogeny: de novo assembly and profiling of the Gryllus rubens transcriptome. Mol Ecol Resour 16, 1478–1490.
Grasshopper (Chorthippus biguttulus)	Arthropoda	All ontogeny (7 stages)	transcriptome	intraspecific	N	NA	Berdan, E.L., Finck, J., Johnston, P.R., Waurick, I., Mazzoni, C.J., and Mayer, F. (2017). Transcriptome profiling of ontogeny in the acridid grasshopper Chorthippus biguttulus. PLoS ONE 12, e0177367.
Caenorhabditis elegans	Nematoda	embryogenesis (30 min intervals)	transcriptome	intraspecific	N	NA	Boeck, M.E., Huynh, C., Gevirtzman, L., Thompson, O.A., Wang, G., Kasper, D.M., Reinke, V., Hillier, L.W., and Waterston, R.H. (2016). The time-resolved transcriptome of C. elegans. Genome Res 26, 1441–1450.
Vertebrates	Chordata	Embryogenesis	DNA methylation	D. rerio, X. tropicalis, M. musculus	Y	DNA methylation at enhancers	Bogdanović, O., Smits, A.H., Mustienes, E. de la C., Tena, J.J., Ford, E., Williams, R., Senanayake, U., Schultz, M.D., Hontelez, S., Kruijsbergen, I. van, et al. (2016). Active DNA demethylation at enhancers during the vertebrate phylotypic period. Nat Genet 48, 417–426.
Daphnia magna	Arthropoda	All ontogeny	transcriptome	intraspecific	N	NA	Campos, B., Fletcher, D., Piña, B., Tauler, R., and Barata, C. (2018). Differential gene transcription across the life cycle in Daphnia magna using a new all genome custom-made microarray. BMC Genomics 19, 370.
C. elegans	Nematoda	All ontogeny	transcriptome	Intraspecific (2 genotypes)	Y	Transcriptome expression	Capra, E.J., Skrovanek, S.M., and Kruglyak, L. (2008). Comparative developmental expression profiling of two C. elegans isolates. PLoS ONE 3, e4055.
Drosophila melanogaster	Arthropoda	All ontogeny	proteome	intraspecific	N	NA	Casas-Vila, N., Bluhm, A., Sayols, S., Dinges, N., Dejung, M., Altenhein, T., Kappei, D., Altenhein, B., Roignant, J.-Y., and Butter, F. (2017). The developmental proteome of Drosophila melanogaster. Genome Res 27, 1273–1285.
Fungi	Fungi	All ontogeny	transcriptome	C. cinerea, A. bisporus	Y	Transcriptome Age Index, Transcriptome Divergence Index	Cheng, X., Hui, J.H.L., Lee, Y.Y., Law, P.T.W., and Kwan, H.S. (2015). A “developmental hourglass” in fungi. Mol Biol Evol 32, 1556–1566.
Brugia malayi	Nematoda	All ontogeny	transcriptome	intraspecific	N	NA	Choi, Y.-J., Ghedin, E., Berriman, M., McQuillan, J., Holroyd, N., Mayhew, G.F., Christensen, B.M., and Michalski, M.L. (2011). A deep sequencing approach to comparatively analyze the transcriptome of lifecycle stages of the filarial worm, Brugia malayi. PLoS Neglect Trop D 5, e1409.
Peanut (Arachis hypogaea)	Angiosperm	All ontogeny	transcriptome	intraspecific	N	NA	Clevenger, J., Chu, Y., Scheffler, B., and Ozias-Akins, P. (2016). A developmental transcriptome map for allotetraploid Arachis hypogaea. Front Plant Sci 7, 1446.
Vertebrates	Chordata	All ontogeny	signal transduction cascades	D. rerio, M. musculus	Y	NA	Comte, A., Roux, J., and Robinson‐Rechavi, M. (2010). Molecular signaling in zebrafish development and the vertebrate phylotypic period. Evol Dev 12, 144–156.
Demosponge (Amphimedon queenslandica)	Porifera	All ontogeny	transcriptome	intraspecific	N	NA	Conaco, C., Neveu, P., Zhou, H., Arcila, M., Degnan, S.M., Degnan, B.M., and Kosik, K.S. (2012). Transcriptome profiling of the demosponge Amphimedon queenslandica reveals genome-wide events that accompany major life cycle transitions. BMC Genomics 13, 209.
Nematodes	Nematoda	Embryogenesis, All ontogeny	transcriptome	C. elegans, C. briggsae	Y	Coding sequence	Cutter, A.D., Garrett, R.H., Mark, S., Wang, W., and Sun, L. (2019). Molecular evolution across developmental time reveals rapid divergence in early embryogenesis. Evol Lett 3, 359–373.
Animals	Chordata, Arthropoda	All ontogeny	transcriptome	D. rerio, Drosophila	Y	Transcriptome Age Index	Domazet-Lošo, T., and Tautz, D. (2010). A phylogenetically based transcriptome age index mirrors ontogenetic divergence patterns. Nature 468, 815–818.
Atlantic Cod (Gadus morhua)	Chordata	Embryogenesis	transcriptome	intraspecific	N	NA	Drivenes, Ø., Taranger, G.L., and Edvardsen, R.B. (2012). Gene expression profiling of atlantic cod (Gadus morhua) embryogenesis using microarray. Mar Biotechnol 14, 167–176.
Eukaryotes	Chordata, Arthropoda, Angiosperm	Embryo - Mature	transcriptome	D. rerio, D. melanogaster, A. thaliana	Y	Transcriptome Age Index, Transcriptome Divergence Index	Drost, H.-G., Gabel, A., Grosse, I., and Quint, M. (2015). Evidence for active maintenance of phylotranscriptomic hourglass patterns in animal and plant embryogenesis. Mol Biol Evol 32, 1221–1231.
Arabadopsis thaliana	Angiosperm	All ontogeny	transcriptome	intraspecific	N	Transcriptome Age Index, Transcriptome expression	Drost, H.-G., Bellstädt, J., Ó’Maoiléidigh, D.S., Silva, A.T., Gabel, A., Weinholdt, C., Ryan, P.T., Dekkers, B.J.W., Bentsink, L., Hilhorst, H.W.M., et al. (2016). Post-embryonic hourglass patterns mark ontogenetic transitions in plant development. Mol Biol Evol 33, 1158–1163.
brittle star A(Amphiura filiformis)	Echinodermata	cleavage - late gastrula	transcriptome	intraspecific	N	Transcriptome expression	Dylus, D.V., Czarkwiani, A., Blowes, L.M., Elphick, M.R., and Oliveri, P. (2018). Developmental transcriptomics of the brittle star Amphiura filiformis reveals gene regulatory network rewiring in echinoderm larval skeleton evolution. Genome Biol 19, 26.
Drosophila mojavensis	Arthropoda	Late embryo - adult	transcriptome	intraspecific	N	NA	Etges, W.J., Trotter, M.V., Oliveira, C.C. de, Rajpurohit, S., Gibbs, A.G., and Tuljapurkar, S. (2015). Deciphering life history transcriptomes in different environments. Mol Ecol 24, 151–179.
Mammals	Chordata	Early organogenesis	transcriptome	H. sapiens, M. musculus	Y	Transcriptome expression	Fang, H., Yang, Y., Li, C., Fu, S., Yang, Z., Jin, G., Wang, K., Zhang, J., and Jin, Y. (2010). Transcriptome analysis of early organogenesis in human embryos. Dev Cell 19, 174–184.
Bighead carp (Hypophthalmichthys nobilis)	Chordata	Early development (6 stages)	transcriptome	intraspecific	N	NA	Fu, J., Zhu, W., Wang, L., Luo, M., Song, F., and Dong, Z. (2019). Dynamic transcriptome sequencing and analysis during early development in the bighead carp (Hypophthalmichthys nobilis). BMC Genomics 20, 781.
Rice (Oryza sativa)	Angiosperm	All ontogeny	transcriptome	intraspecific	N	NA	Fujita, M., Horiuchi, Y., Ueda, Y., Mizuta, Y., Kubo, T., Yano, K., Yamaki, S., Tsuda, K., Nagata, T., Niihama, M., et al. (2010). Rice expression atlas in reproductive development. Plant Cell Physiol 51, 2060–2081.
Salmon louse (Caligus rogercresseyi)	Arthropoda	Nauplius I - adult (5 stages)	transcriptome	intraspecific	N	NA	Gallardo-Escárate, C., Valenzuela-Muñoz, V., and Nuñez-Acuña, G. (2014). RNA-seq analysis using de novo transcriptome assembly as a reference for the salmon louse Caligus rogercresseyi. PLoS ONE 9, e92239.
invertebrates	Nematoda, Arthropoda	All ontogeny	alternative splicing	C. elegans, D. melanogaster	Y	Alternative splicing patterns of conserved exons	Gao, R., and Li, J.J. (2017). Correspondence of D. melanogaster and C. elegans developmental stages revealed by alternative splicing characteristics of conserved exons. BMC Genomics 18, 234.
Arabadopsis thaliana	Angiosperm	Embryogenesis	transcriptome	intraspecific	N	NA	Gao, P., Xiang, D., Quilichini, T.D., Venglat, P., Pandey, P.K., Wang, E., Gillmor, C.S., and Datla, R. (2019). Gene expression atlas of embryo development in Arabidopsis. Plant Reprod 32, 93–104.
invertebrates	Nematoda, Arthropoda	All ontogeny	transcriptome	C. elegans, D. melanogaster	Y	Transcriptome expression	Gerstein, M.B., Rozowsky, J., Yan, K.-K., Wang, D., Cheng, C., Brown, J.B., Davis, C.A., Hillier, L., Sisu, C., Li, J.J., et al. (2014). Comparative analysis of the transcriptome across distant species. Nature 512, 445–448.
Urchin (Paracentrotus lividus)	Echinodermata	Fertilized egg - prism stage	transcriptome	intraspecific	N	NA	Gildor, T., Malik, A., Sher, N., Avraham, L., and de-Leon, S.B.-T. (2016). Quantitative developmental transcriptomes of the Mediterranean sea urchin Paracentrotus lividus. Mar Genom 25, 89–94.
Homo sapiens	Chordata	Early embryogenesis (6 stages)	transcription factor expression	intraspecific	N	NA	Godini, R., and Fallahi, H. (2019). Dynamics changes in the transcription factors during early human embryonic development. J Cell Physiol 234, 6489–6502.
Plants	Angiosperm	All ontogeny	transcriptome	O. sativa, G. max, P. patens, A. thaliana	Y	Transcriptome expression, Transcriptome Age Index, Transcriptome Divergence Index, Transcriptome Polymorphism Index; dN/dS	Gossmann, T.I., Saleh, D., Schmid, M.W., Spence, M.A., and Schmid, K.J. (2016). Transcriptomes of plant gametophytes have a higher proportion of rapidly evolving and young genes than sporophytes. Mol Biol Evol 33, 1669–1678.
Drosophila melanogaster	Arthropoda	All ontogeny	transcriptome	intraspecific	N	NA	Graveley, B.R., Brooks, A.N., Carlson, J.W., Duff, M.O., Landolin, J.M., Yang, L., Artieri, C.G., Baren, M.J. van, Boley, N., Booth, B.W., et al. (2011). The developmental transcriptome of Drosophila melanogaster. Nature 471, 473–479.
Caenorhabditis	Nematoda	All ontogeny	transcriptome, protein expression	C. elegans, C. briggsae	Y	mRNA & protein expression	Grün, D., Kirchner, M., Thierfelder, N., Stoeckius, M., Selbach, M., and Rajewsky, N. (2014). Conservation of mRNA and protein expression during development of C. elegans. Cell Reports 6, 565–577.
Arctic charr (Salvelinud alpinus)	Chordata	All ontogeny	transcriptome	intraspecific	N	NA	Gudbrandsson, J., Ahi, E.P., Franzdottir, S.R., Kapralova, K.H., Kristjansson, B.K., Steinhaeuser, S.S., Maier, V.H., Johannesson, I.M., Snorrason, S.S., Jonsson, Z.O., et al. (2015). The developmental transcriptome of contrasting Arctic charr (Salvelinus alpinus) morphs. F1000Research 4, 136.
Mus musculus	Chordata	Early embryogenesis	transcriptome	intraspecific	N	NA	Hamatani, T., Carter, M.G., Sharov, A.A., and Ko, M.S.H. (2004). Dynamics of global gene expression changes during mouse preimplantation development. Dev Cell 6, 117–131.
Homo sapiens	Chordata	4-cell - blastocyst	transcriptome	intraspecific	N	NA	Hasegawa, Y., Taylor, D., Ovchinnikov, D.A., Wolvetang, E.J., Torrenté, L. de, and Mar, J.C. (2015). Variability of gene expression identifies transcriptional regulators of early human embryonic development. PLoS Genet 11, e1005428.
animals	Animalia	germ layer development	transcriptome	C. elegan, X. tropicalis, N. vectensis, A. queenslandica	Y	Transcriptome expression	Hashimshony, T., Feder, M., Levin, M., Hall, B.K., and Yanai, I. (2015). Spatiotemporal transcriptomics reveals the evolutionary history of the endoderm germ layer. Nature 519, 219–222.
Sea anemone (Nematostella vectensis)	Cnidaria	Early development	transcriptome	intraspecific	N	NA	Helm, R.R., Siebert, S., Tulin, S., Smith, J., and Dunn, C.W. (2013). Characterization of differential transcript abundance through time during Nematostella vectensisdevelopment. BMC Genomics 14, 266.
Marine mollusc (Aplysia californica)	Mollusca	Embryonic - Larval - Metamorphic	transcriptome	intraspecific	N	NA	Heyland, A., Vue, Z., Voolstra, C.R., Medina, M., and Moroz, L.L. (2011). Developmental transcriptome of Aplysia californica. J Exp Zoology Part B Mol Dev Evol 316B, 113–134.
Chordates	Chordata	Embryogenesis	transcriptome	8 chordates	Y	Transcriptome expression	Hu, H., Uesaka, M., Guo, S., Shimai, K., Lu, T.-M., Li, F., Fujimoto, S., Ishikawa, M., Liu, S., Sasagawa, Y., et al. (2017). Constrained vertebrate evolution by pleiotropic genes. Nat Ecol Evol 1, 1722–1730.
Abalone (Haliotis diversicolor)	Mollusca	All ontogeny	transcriptome	intraspecific	N	NA	Huang, Z.-X., Chen, Z.-S., Ke, C.-H., Zhao, J., You, W.-W., Zhang, J., Dong, W.-T., and Chen, J. (2012). Pyrosequencing of Haliotis diversicolor transcriptomes: insights into early developmental molluscan gene expression. PLoS ONE 7, e51279.
Chicken (Gallus gallus)	Chordata	Oocyte - 25hrs post fertilization	transcriptome	intraspecific	N	NA	Hwang, Y.S., Seo, M., Lee, B.R., Lee, H.J., Park, Y.H., Kim, S.K., Lee, H.C., Choi, H.J., Yoon, J., Kim, H., et al. (2018). The transcriptome of early chicken embryo reveal signaling pathways governing rapid asymmetric cellularization and lineage segregation. Development 145, dev.157453.
Vertebrates	Chordata	Embryogenesis	transcriptome	M. musculus, G. gallus, X. laevis, D. rerio	Y	Transcriptome expression	Irie, N., and Kuratani, S. (2011). Comparative transcriptome analysis reveals vertebrate phylotypic period during organogenesis. Nat Commun 2, 248.
Urchins (Heliocidaris)	Echinodermata	Embryogenesis	transcriptome	L. variegatus, H. tuberculata, H. erythrogramma	Y	Transcriptome expression	Israel, J.W., Martik, M.L., Byrne, M., Raff, E.C., Raff, R.A., McClay, D.R., and Wray, G.A. (2016). Comparative developmental transcriptomics reveals rewiring of a highly conserved gene regulatory network during a major life history switch in the sea urchin genus Heliocidaris. PLoS Biol 14, e1002391.
Dipterans	Arthropoda	Early embryogenesis	transcriptome	C. albipunctata, E. balteatus, M. abdita, D. melanogaster	Y	NA	Jiménez-Guri, E., Huerta-Cepas, J., Cozzuto, L., Wotton, K.R., Kang, H., Himmelbauer, H., Roma, G., Gabaldón, T., and Jaeger, J. (2013). Comparative transcriptomics of early dipteran development. BMC Genomics 14, 123.
Eusocial Bee (Megalopta genalis)	Arthropoda	All ontogeny	transcriptome	intraspecific	N	NA	Jones, B.M., Wcislo, W.T., and Robinson, G.E. (2015). Developmental transcriptome for a facultatively eusocial bee, Megalopta genalis. G3 5, 2127–2135.
Atlantic Sturgeon (Acipenser oxyrinchus)	Chordata	Embryo - Larva (8 stages)	transcriptome	intraspecific	N	NA	Kaitetzidou, E., Ludwig, A., Gessner, J., and Sarropoulou, E. (2017). Expression patterns of Atlantic sturgeon (Acipenser oxyrinchus) during embryonic development. G3 7, 533–542.
Drosophila	Arthropoda	Embryogenesis	transcriptome	6 Drosophila spp.	Y	Transcriptome expression, dN/dS	Kalinka, A.T., Varga, K.M., Gerrard, D.T., Preibisch, S., Corcoran, D.L., Jarrells, J., Ohler, U., Bergman, C.M., and Tomancak, P. (2010). Gene expression divergence recapitulates the developmental hourglass model. Nature 468, 811–814.
Ciona intestinalis	Chordata	All ontogeny	transcriptome	intraspecific	N	NA	Kawashima, T., Satou, Y., Murakami, S.D., and Satoh, N. (2005). Dynamic changes in developmental gene expression in the basal chordate Ciona intestinalis. Develop Growth Differ 47, 187–199.
Dipterans	Arthropoda	All ontogeny	transcriptome	A. gambiae, D. melanogaster	Y	Transcriptome expression	Koutsos, A.C., Blass, C., Meister, S., Schmidt, S., MacCallum, R.M., Soares, M.B., Collins, F.H., Benes, V., Zdobnov, E., Kafatos, F.C., et al. (2007). Life cycle transcriptome of the malaria mosquito Anopheles gambiae and comparison with the fruitfly Drosophila melanogaster. Proc National Acad Sci 104, 11304–11309.
Chickpea (Cicer arietinum L.)	Angiosperm	All ontogeny	transcriptome	intraspecific	N	NA	Kudapa, H., Garg, V., Chitikineni, A., and Varshney, R.K. (2018). The RNA‐Seq‐based high resolution gene expression atlas of chickpea (Cicer arietinum L.) reveals dynamic spatio‐temporal changes associated with growth and development. Plant Cell Environ 41, 2209–2225.
Drosophila melanogaster	Arthropoda	Embryogenesis	enhancer activity	intraspecific	N	NA	Kvon, E.Z., Kazmar, T., Stampfel, G., Yáñez-Cuna, J.O., Pagani, M., Schernhuber, K., Dickson, B.J., and Stark, A. (2014). Genome-scale functional characterization of Drosophila developmental enhancers in vivo. Nature 512, 91–95.
Rabbit (Oryctolagus cuniculus)	Chordata	Early embryogenesis	transcriptome	intraspecific	N	NA	Léandri, R.D., Archilla, C., Bui, L.C., Peynot, N., Liu, Z., Cabau, C., Chastellier, A., Renard, J.P., and Duranthon, V. (2009). Revealing the dynamics of gene expression during embryonic genome activation and first differentiation in the rabbit embryo with a dedicated array screening. Physiol Genomics 36, 98–113.
hover fly (Episyrphus balteaus)	Arthropoda	Embryogenesis	transcriptome	intraspecific	N	NA	Lemke, S., Antonopoulos, D.A., Meyer, F., Domanus, M.H., and Schmidt-Ott, U. (2011). BMP signaling components in embryonic transcriptomes of the hover fly Episyrphus balteatus (Syrphidae). BMC Genomics 12, 278.
Nematodes	Nematoda	Embryogenesis	transcriptome	5 Caenorhabditis spp.	Y	Transcriptome expression	Levin, M., Hashimshony, T., Wagner, F., and Yanai, I. (2012). Developmental milestones punctuate gene expression in the Caenorhabditis embryo. Dev Cell 22, 1101–1108.
Animals	Animalia	Embryogenesis	transcriptome	10 species/phyla	Y	Transcriptome expression	Levin, M., Anavy, L., Cole, A.G., Winter, E., Mostov, N., Khair, S., Senderovich, N., Kovalev, E., Silver, D.H., Feder, M., et al. (2016). The mid-developmental transition and the evolution of animal body plans. Nature 531, 637–641.
invertebrates	Nematoda, Arthropoda	All ontogeny	transcriptome	C. elegans, D. melanogaster	Y	Transcriptome expression	Li, J.J., Huang, H., Bickel, P.J., and Brenner, S.E. (2014). Comparison of D. melanogaster and C. elegans developmental stages, tissues, and cells by modENCODE RNA-seq data. Genome Res 24, 1086–1101.
Bilateria	Chordata, Arthropoda	All ontogeny	transcriptome	D. melanogaster, D. rerio, M. musculus	Y	Transcriptome expression, Transcriptome Index of Connectivity	Liu, J., and Robinson-Rechavi, M. (2018a). Developmental constraints on genome evolution in four bilaterian model species. Genome Biol Evol 10, 2266–2277.
Bilateria	Chordata, Arthropoda	All ontogeny	transcriptome	D. melanogaster, D. rerio, M. musculus	Y	Transcriptome index of ΔlnL, Polygenic selection analysis	Liu, J., and Robinson-Rechavi, M. (2018b). Adaptive evolution of animal proteins over development: support for the Darwin selection opportunity hypothesis of evo-devo. Mol Biol Evol.
Chicken (Gallus gallus)	Chordata	Embryogenesis	transcription start sites	intraspecific	N	NA	Lizio, M., Deviatiiarov, R., Nagai, H., Galan, L., Arner, E., Itoh, M., Lassmann, T., Kasukawa, T., Hasegawa, A., Ros, M.A., et al. (2017). Systematic analysis of transcription start sites in avian development. PLoS Biol 15, e2002887.
Plasmodium falciparum	Apicomplexa	48hr intraerythrocytic developmental cycle	transcriptome	Intraspecific (3 genotypes)	Y	Transcriptome expression	Llinás, M., Bozdech, Z., Wong, E.D., Adai, A.T., and DeRisi, J.L. (2006). Comparative whole genome transcriptome analysis of three Plasmodium falciparum strains. Nucleic Acids Res 34, 1166–1173.
Nematodes	Nematoda	Embryogenesis	transcriptome	C. elegans, C. angaria, S. feltiae, S. carpocapsae	Y	Transcriptome expression	Macchietto, M., Angdembey, D., Heidarpour, N., Serra, L., Rodriguez, B., El-Ali, N., and Mortazavi, A. (2017). Comparative transcriptomics of Steinernema and Caenorhabditis single embryos reveals orthologous gene expression convergence during late embryogenesis. Genome Biol Evol 9, 2681–2696.
Plasmodium falciparum	Apicomplexa	48hr intraerythrocytic developmental cycle	transcriptome	Intraspecific (8 genotypes)	Y	Transcriptome expression	Mackinnon, M.J., Li, J., Mok, S., Kortok, M.M., Marsh, K., Preiser, P.R., and Bozdech, Z. (2009). Comparative transcriptional and genomic analysis of Plasmodium falciparum field isolates. PLoS Pathog 5, e1000644.
Mussels (Mytilus galloprovincialis)	Mollusca	no access		intraspecific		NA?	Maiorova, M.A., Satoh, N., Khalturin, K., and Odintsova, N.A. (2019). Transcriptomic profiling of the mussel Mytilus trossulus with a special emphasis on integrin-like genes during development. Invertebr Reprod Dev 63, 231–240.
Urchin	Echinodermata	Embryogenesis	transcriptome	P. lividus, S. purpuratus	Y	Transcriptome expression	Malik, A., Gildor, T., Sher, N., Layous, M., and de-Leon, S.B.-T. (2017). Parallel embryonic transcriptional programs evolve under distinct constraints and may enable morphological conservation amidst adaptation. Dev Biol 430, 202–213.
Danio rerio	Chordata	Embryogenesis	transcriptome	intraspecific	N	NA	Mathavan, S., Lee, S.G.P., Mak, A., Miller, L.D., Murthy, K.R.K., Govindarajan, K.R., Tong, Y., Wu, Y.L., Lam, S.H., Yang, H., et al. (2005). Transcriptome analysis of zebrafish embryogenesis using microarrays. PLoS Genet 1, e29.
Ciona intestinalis	Chordata	Early embryogenesis	transcriptome	intraspecific	N	NA	Matsuoka, T., Ikeda, T., Fujimaki, K., and Satou, Y. (2013). Transcriptome dynamics in early embryos of the ascidian, Ciona intestinalis. Dev Biol 384, 375–385.
Atlantic Halibut (Hippoglossus hippoglossus)	Chordata	Embryogenesis	transcriptome	intraspecific	N	NA	Mommens, M., Fernandes, J.M., Tollefsen, K.E., Johnston, I.A., and Babiak, I. (2014). Profiling of the embryonic Atlantic halibut (Hippoglossus hippoglossus L.) transcriptome reveals maternal transcripts as potential markers of embryo quality. BMC Genomics 15, 829.
Mussel (Mytilus galloprovincialis)	Mollusca	Early development	transcriptome	intraspecific	N	NA	Moreira, R., Pereiro, P., Balseiro, P., Milan, M., Pauletto, M., Bargelloni, L., Novoa, B., and Figueras, A. (2018). Revealing Mytilus galloprovincialis transcriptomic profiles during ontogeny. Dev Comp Immunol 84, 292–306.
Danio rerio	Chordata	Embryogenesis	transcription initiation	intraspecific	N	NA	Nepal, C., Hadzhiev, Y., Previti, C., Haberle, V., Li, N., Takahashi, H., Suzuki, A.M.M., Sheng, Y., Abdelhamid, R.F., Anand, S., et al. (2013). Dynamic regulation of the transcription initiation landscape at single nucleotide resolution during vertebrate embryogenesis. Genome Res 23, 1938–1950.
Drosophila	Arthropoda	All ontogeny	microRNA expression	D. melanogaster, D. virilis	Y	microarray expression	Ninova, M., Ronshaugen, M., and Griffiths-Jones, S. (2014). Conserved temporal patterns of microRNA expression in Drosophila support a developmental hourglass model. Genome Biol Evol 6, 2459–2467.
Razor Clam (Sinonovacula constricta)	Mollusca	Embryo - Juvenile	transcriptome	intraspecific	N	NA	Niu, D., Wang, F., Xie, S., Sun, F., Wang, Z., Peng, M., and Li, J. (2016). Developmental transcriptome analysis and identification of genes involved in larval metamorphosis of the razor clam, Sinonovacula constricta. Mar Biotechnol 18, 168–175.
Ciona intestinalis	Chordata	Embryogenesis	proteome	intraspecific	N	NA	Nomura, M., Nakajima, A., and Inaba, K. (2009). Proteomic profiles of embryonic development in the ascidian Ciona intestinalis. Dev Biol 325, 468–481.
Mus musculus	Chordata	Organogenesis (forebrain, heart, liver)	active enhancers	intraspecific	N	NA	Nord, A.S., Blow, M.J., Attanasio, C., Akiyama, J.A., Holt, A., Hosseini, R., Phouanenavong, S., Plajzer-Frick, I., Shoukry, M., Afzal, V., et al. (2013). Rapid and pervasive changes in genome-wide enhancer usage during mammalian development. Cell 155, 1521–1531.
Caenorhabditis elegans	Nematoda	Embryogenesis	transcriptome	intraspecific	N	NA	Packer, J.S., Zhu, Q., Huynh, C., Sivaramakrishnan, P., Preston, E., Dueck, H., Stefanik, D., Tan, K., Trapnell, C., Kim, J., et al. (2019). A lineage-resolved molecular atlas of C. elegans embryogenesis at single-cell resolution. Science 365, eaax1971.
Social amoeba (Dictostelium)	Amoebozoa	24 hour developmental programs	transcriptome	D. discoideum, D. purpureum	Y	Transcriptome expression	Parikh, A., Miranda, E.R., Katoh-Kurasawa, M., Fuller, D., Rot, G., Zagar, L., Curk, T., Sucgang, R., Chen, R., Zupan, B., et al. (2010). Conserved developmental transcriptomes in evolutionarily divergent species. Genome Biol 11, R35.
Tomato (Solanum pimpinellifolium)	Angiosperm	Early fruit development	transcriptome	intraspecific	N	NA	Pattison, R.J., Csukasi, F., Zheng, Y., Fei, Z., Knaap, E. van der, and Catalá, C. (2015). Comprehensive tissue-specific transcriptome analysis reveals distinct regulatory programs during early tomato fruit development. Plant Physiol 168, 1684–1701.
Danio rerio	Chordata	Embryogenesis	long noncoding RNA	intraspecific	N	NA	Pauli, A., Valen, E., Lin, M.F., Garber, M., Vastenhouw, N.L., Levin, J.Z., Fan, L., Sandelin, A., Rinn, J.L., Regev, A., et al. (2012). Systematic identification of long noncoding RNAs expressed during zebrafish embryogenesis. Genome Res 22, 577–591.
Pigeonpea (Cajanus cajan)	Angiosperm	All ontogeny	transcriptome	intraspecific	N	NA	Pazhamala, L.T., Purohit, S., Saxena, R.K., Garg, V., Krishnamurthy, L., Verdier, J., and Varshney, R.K. (2017). Gene expression atlas of pigeonpea and its application to gain insights into genes associated with pollen fertility implicated in seed formation. J Exp Bot 68, erx010.
Vertebrates	Chordata	All ontogeny	transcriptome	M. musculus, D. rerio	Y	dN/dS, gene age, expression, number of TFs	Piasecka, B., Lichocki, P., Moretti, S., Bergmann, S., and Robinson-Rechavi, M. (2013). The hourglass and the early conservation models—co-existing patterns of developmental constraints in vertebrates. PLoS Genet 9, e1003476.
Coral (Acropora palmata)	Cnidaria	Embryogenesis	transcriptome	intraspecific	N	NA	Portune, K.J., Voolstra, C.R., Medina, M., and Szmant, A.M. (2010). Development and heat stress-induced transcriptomic changes during embryogenesis of the scleractinian coral Acropora palmata. Mar Genom 3, 51–62.
Butterfly (Pieris rapae)	Arthropoda	All ontogeny	transcriptome	intraspecific	N	NA	Qi, L., Fang, Q., Zhao, L., Xia, H., Zhou, Y., Xiao, J., Li, K., and Ye, G. (2016). De novo assembly and developmental transcriptome analysis of the small white butterfly Pieris rapae. PLoS ONE 11, e0159258.
Sponge (Mycale phyllophila)	Porifera	All ontogeny	transcriptome	Amphimedon queenslandica	Y	Transcriptome expression	Qiu, F., Ding, S., Ou, H., Wang, D., Chen, J., and Miyamoto, M.M. (2015). Transcriptome changes during the life cycle of the red sponge, Mycale phyllophila (Porifera, Demospongiae, Poecilosclerida). Genes 6, 1023–1052.
Plants	Angiosperm	Embryogenesis	transcriptome	A. thaliana, A. lyrata, C. rubella, B. rapa	Y	evolutionary age, sequence divergence, Transcriptome Age Index, Transcriptome Divergence Index	Quint, M., Drost, H.-G., Gabel, A., Ullrich, K.K., Bönn, M., and Grosse, I. (2012). A transcriptomic hourglass in plant embryogenesis. Nature 490, 98–101.
Danio rerio	Chordata	Embryogenesis	transcriptome	intraspecific	N	NA	Rauwerda, H., Pagano, J.F.B., Leeuw, W.C. de, Ensink, W., Nehrdich, U., Jong, M. de, Jonker, M., Spaink, H.P., and Breit, T.M. (2017). Transcriptome dynamics in early zebrafish embryogenesis determined by high-resolution time course analysis of 180 successive, individual zebrafish embryos. BMC Genomics 18, 287.
Chicken (Gallus gallus)	Chordata	Early embryogenesis	transcriptome	intraspecific	N	NA	Ren, J., Sun, C., Clinton, M., and Yang, N. (2019). Dynamic transcriptional landscape of the early chick embryo. Frontiers Cell Dev Biology 7, 196.
Rat (Rattus rattus)	Chordata	Embryogenesis	transcriptome	intraspecific	N	NA	Robinson, J.F., Verhoef, A., and Piersma, A.H. (2012). Transcriptomic analysis of neurulation and early organogenesis in rat embryos: an in vivo and ex vivo comparison. Toxicol Sci 126, 255–266.
Social amoeba (Dictostelium discoideum)	Amoebozoa	24 hour developmental program	transcriptome	intraspecific	N	NA	Rosengarten, R.D., Santhanam, B., Fuller, D., Katoh-Kurasawa, M., Loomis, W.F., Zupan, B., and Shaulsky, G. (2015). Leaps and lulls in the developmental transcriptome of Dictyostelium discoideum. BMC Genomics 16, 294.
Vertebrates	Chordata	embryogenesis	transcriptome	D. rerio, M. musculus	Y	dN/dS, expression of essential genes	Roux, J., and Robinson-Rechavi, M. (2008). Developmental constraints on vertebrate genome evolution. PLoS Genet 4, e1000311.
Drosophila melanogaster	Arthropoda	Embryogenesis	spatial RNA expression	intraspecific	N	NA	Salvador-Martínez, I., and Salazar-Ciudad, I. (2015). How complexity increases in development: An analysis of the spatial–temporal dynamics of 1218 genes in Drosophila melanogaster. Dev Biol 405, 328–339.
Hydractiniid Hydrozoans	Cnidaria	All ontogeny	transcriptome	H. symbiolongicarpus, P. carnea	Y	Transcriptome expression	Sanders, S.M., and Cartwright, P. (2015). Interspecific differential expression analysis of RNA-seq data yields insight into life cycle variation in Hydractiniid Hydrozoans. Genome Biol Evol 7, 2417–2431.
Metazoan	Chordata, Arthropoda, Nematoda	Embryogenesis	transcription factor expression	C. intestinalis, D.rerio, X. tropicalis, D. melanogaster, A.gambiae, C. elegans	Y	Transcription Factor Expression	Schep, A.N., and Adryan, B. (2013). A comparative analysis of transcription factor expression during metazoan embryonic development. PLoS ONE 8, e66826.
Arabadopsis thaliana	Angiosperm	All ontogeny	transcriptome	intraspecific	N	NA	Schmid, M., Davison, T.S., Henz, S.R., Pape, U.J., Demar, M., Vingron, M., Schölkopf, B., Weigel, D., and Lohmann, J.U. (2005). A gene expression map of Arabidopsis thaliana development. Nat Genet 37, 501–506.
Mus musculus	Chordata	Embryogenesis	transcriptome	intraspecific	N	NA	Sharov, A.A., Piao, Y., Matoba, R., Dudekula, D.B., Qian, Y., VanBuren, V., Falco, G., Martin, P.R., Stagg, C.A., Bassey, U.C., et al. (2003). Transcriptome analysis of mouse stem cells and early embryos. PLoS Biol 1, e74.
Homo sapiens	Chordata	Oocyte - Blastocyst	transcriptome	intraspecific	N	NA	Shaw, L., Sneddon, S.F., Zeef, L., Kimber, S.J., and Brison, D.R. (2013). Global gene expression profiling of individual human oocytes and embryos demonstrates heterogeneity in early development. PLoS One 8, e64192.
Insects	Arthropoda	Embryogenesis	transcriptome	D.melanogaster - I. elegans	Y	Transcriptome expression	Simon, S., Sagasser, S., Saccenti, E., Brugler, M.R., Schranz, M.E., Hadrys, H., Amato, G., and DeSalle, R. (2017). Comparative transcriptomics reveal developmental turning points during embryogenesis of a hemimetabolous insect, the damselfly Ischnura elegans. Sci Rep 7, 13547.
Whelk (Rapana venosa)	Mollusca	Early development	transcriptome	intraspecific	N	NA	Song, H., Yu, Z.-L., Sun, L.-N., Gao, Y., Zhang, T., and Wang, H.-Y. (2016a). De novo transcriptome sequencing and analysis of Rapana venosa from six different developmental stages using Hi-seq 2500. Comp Biochem Physiology Part D Genom Proteom 17, 48–57.
Whelk (Rapana venosa)	Mollusca	Early development	transcriptome	intraspecific	N	NA	Song, H., Yu, Z.-L., Sun, L.-N., Xue, D.-X., Zhang, T., and Wang, H.-Y. (2016b). Transcriptomic analysis of differentially expressed genes during larval development of Rapana venosa by digital gene expression profiling. G3 6, 2181–2193.
Atlantic Haddock (Melanogrammus aeglefinus)	Chordata	Embryogenesis - Larva	transcriptome	intraspecific	N	NA	Sørhus, E., Incardona, J.P., Furmanek, T., Jentoft, S., Meier, S., and Edvardsen, R.B. (2016). Developmental transcriptomics in Atlantic haddock: illuminating pattern formation and organogenesis in non-model vertebrates. Dev Biol 411, 301–313.
Cnidarian (Edwardsiella lineata)	Cnidaria	All ontogeny	transcriptome	intraspecific	N	NA	Stefanik, D.J., Lubinski, T.J., Granger, B.R., Byrd, A.L., Reitzel, A.M., DeFilippo, L., Lorenc, A., and Finnerty, J.R. (2014). Production of a reference transcriptome and transcriptomic database (EdwardsiellaBase) for the lined sea anemone, Edwardsiella lineata, a parasitic cnidarian. BMC Genomics 15, 71.
Xenopus laevis	Chordata	Early embryogenesis	proteome	intraspecific	N	NA	Sun, L., Bertke, M.M., Champion, M.M., Zhu, G., Huber, P.W., and Dovichi, N.J. (2014). Quantitative proteomics of Xenopus laevis embryos: expression kinetics of nearly 4000 proteins during early development. Sci Rep 4, 4365.
Arabadopsis thaliana	Angiosperm	Seed - Seedling	transcriptome	intraspecific	N	NA	Silva, A.T., Ribone, P.A., Chan, R.L., Ligterink, W., and Hilhorst, H.W.M. (2016). A predictive coexpression network identifies novel genes controlling the seed-to-seedling phase transition in Arabidopsis thaliana. Plant Physiol 170, 2218–2231.
Xenopus tropicalis	Chordata	Embryogenesis and Larval	transcriptome	intraspecific	N	NA	Tan, M.H., Au, K.F., Yablonovitch, A.L., Wills, A.E., Chuang, J., Baker, J.C., Wong, W.H., and Li, J.B. (2013). RNA sequencing reveals a diverse and dynamic repertoire of the Xenopus tropicalis transcriptome over development. Genome Res 23, 201–216.
Danio rerio	Chordata	Embryogenesis	proteome	intraspecific	N	NA	Tay, T.L., Lin, Q., Seow, T.K., Tan, K.H., Hew, C.L., and Gong, Z. (2006). Proteomic analysis of protein profiles during early development of the zebrafish, Danio rerio. Proteomics 6, 3176–3188.
Teleosts	Chordata	Embryogenesis	transcriptome; TF expression	D. rerio, O. latipes	Y	Transcriptome expression, Epigenetic markers (H3K4me3, H3K27ac)	Tena, J.J., González-Aguilera, C., Fernández-Miñán, A., Vázquez-Marín, J., Parra-Acero, H., Cross, J.W., Rigby, P.W.J., Carvajal, J.J., Wittbrodt, J., Gómez-Skarmeta, J.L., et al. (2014). Comparative epigenomics in distantly related teleost species identifies conserved cis-regulatory nodes active during the vertebrate phylotypic period. Genome Res 24, 1075–1085.
Drosophila melanogaster	Arthropoda	Embryogenesis	spatial RNA expression	intraspecific	N	NA	Tomancak, P., Beaton, A., Weiszmann, R., Kwan, E., Shu, S., Lewis, S.E., Richards, S., Ashburner, M., Hartenstein, V., Celniker, S.E., et al. (2002). Systematic determination of patterns of gene expression during Drosophila embryogenesis. Genome Biol 3, research0088.1.
Filamentous fungi	Fungi	Stage 1 -5	transcriptome	2 Fusarium spp., 3 Neurospora spp.	Y	Transcriptome expression	Trail, F., Wang, Z., Stefanko, K., Cubba, C., and Townsend, J.P. (2017). The ancestral levels of transcription and the evolution of sexual phenotypes in filamentous fungi. PLoS Genet 13, e1006867.
Nematostella vectensis	Cnidaria	Early embryogenesis	transcriptome	intraspecific	N	NA	Tulin, S., Aguiar, D., Istrail, S., and Smith, J. (2013). A quantitative reference transcriptome for Nematostella vectensis early embryonic development: a pipeline for de novo assembly in emergin gmodel systems. EvoDevo 4, 16.
Homo sapiens	Chordata	Early embryogenesis	transcriptome	intraspecific	N	NA	Vassena, R., Boué, S., González-Roca, E., Aran, B., Auer, H., Veiga, A., and Belmonte, J.C.I. (2011). Waves of early transcriptional activation and pluripotency program initiation during human preimplantation development. Development 138, 3699–3709.
Homo sapiens	Chordata	Oocyte - 8 cell	ploidy level, gene expression	intraspecific	N	NA	Vera-Rodriguez, M., Chavez, S.L., Rubio, C., Pera, R.A.R., and Simon, C. (2015). Prediction model for aneuploidy in early human embryo development revealed by single-cell analysis. Nat Commun 6, 7601.
Danio rerio	Chordata	Early embryogenesis	transcriptome	intraspecific	N	NA	Vesterlund, L., Jiao, H., Unneberg, P., Hovatta, O., and Kere, J. (2011). The zebrafish transcriptome during early development. BMC Dev Biol 11, 30.
Turtles (Pelodiscus sinensis & Chelonia mydas)	Chordata	Embryogenesis	transcriptome	P. sinensis - D. rerio	Y	Transcriptome expression	Wang, Z., Pascual-Anaya, J., Zadissa, A., Li, W., Niimura, Y., Huang, Z., Li, C., White, S., Xiong, Z., Fang, D., et al. (2013). The draft genomes of soft-shell turtle and green sea turtle yield insights into the development and evolution of the turtle-specific body plan. Nat Genet 45, 701–706.
Caenorhabditis elegans	Nematoda	Embryogenesis	spatially resolved transcriptome	intraspecific	N	NA	Warner, A.D., Gevirtzman, L., Hillier, L.W., Ewing, B., and Waterston, R.H. (2019). The C. elegans embryonic transcriptome with tissue, time, and alternative splicing resolution. Genome Res 29, 1036–1045.
Urchin (Strongylocentrotus purpuratus)	Echinodermata	Embryogenesis	transcriptome	intraspecific	N	NA	Wei, Z., Angerer, R.C., and Angerer, L.M. (2006). A database of mRNA expression patterns for the sea urchin embryo. Dev Biol 300, 476–484.
Pacific White Shrimp (Litopenaeus vannemei)	Arthropoda	Early development	transcriptome	intraspecific	N	NA	Wei, J., Zhang, X., Yu, Y., Huang, H., Li, F., and Xiang, J. (2014). Comparative transcriptomic characterization of the early development in Pacific white shrimp Litopenaeus vannamei. PLoS ONE 9, e106201.
Danio rerio	Chordata	Embryogenesis	transcriptome	intraspecific	N	NA	White, R.J., Collins, J.E., Sealy, I.M., Wali, N., Dooley, C.M., Digby, Z., Stemple, D.L., Murphy, D.N., Billis, K., Hourlier, T., et al. (2017). A high-resolution mRNA expression time course of embryonic development in zebrafish. eLife 6, e30860.
Pig (Porcine)	Chordata	Early embryogenesis (5 stages)	transcriptome	intraspecific	N	NA	Whitworth, K.M., Agca, C., Kim, J.-G., Patel, R.V., Springer, G.K., Bivens, N.J., Forrester, L.J., Mathialagan, N., Green, J.A., and Prather, R.S. (2005). Transcriptional profiling of pig embryogenesis by using a 15-K member unigene set specific for pig reproductive tissues and embryos. Biol Reprod 72, 1437–1451.
Burying Beetle (Nirophorus orbicollis)	Arthropoda	All ontogeny	transcriptome	intraspecific	N	NA	Won, H.I., Schulze, T.T., Clement, E.J., Watson, G.F., Watson, S.M., Warner, R.C., Ramler, E.A.M., Witte, E.J., Schoenbeck, M.A., Rauter, C.M., et al. (2018). De novo assembly of the burying beetle Nicrophorus orbicollis (Coleoptera: Silphidae) transcriptome across developmental stages with identification of key immune transcripts. J Genom 6, 41–52.
Urchin (Mesocentrotus franciscanus)	Echinodermata	Early embryogenesis	transcriptome	intraspecific	N	NA	Wong, J.M., Gaitán-Espitia, J.D., and Hofmann, G.E. (2019). Transcriptional profiles of early stage red sea urchins (Mesocentrotus franciscanus) reveal differential regulation of gene expression across development. Mar Genom 48, 100692.
Mango (Mangifera indica Linn)	Angiosperm	Fruit development (4 stages)	transcriptome, protein expression	intraspecific	N	NA	Wu, H., Jia, H., Ma, X., Wang, S., Yao, Q., Xu, W., Zhou, Y., Gao, Z., and Zhan, R. (2014). Transcriptome and proteomic analysis of mango (Mangifera indica Linn) fruits. J Proteomics 105, 19–30.
Trochozoans	Trochozoa	All ontogeny	transcriptome	C. gigas compared with H. discus hannai, P. aibuhitensis, and other groups	Y	Transcriptome Age Index, Transcriptome Divergence Index; dN/dS	Wu, L., Ferger, K.E., and Lambert, J.D. (2019). Gene expression does not support the developmental hourglass model in three animals with spiralian development. Mol Biol Evol 36, 1373–1383.
Squash (Cucurbita pepo)	Angiosperm	Fruit development	transcriptome	Intraspecific (2 genotypes)	Y	NA	Wyatt, L.E., Strickler, S.R., Mueller, L.A., and Mazourek, M. (2016). Comparative analysis of Cucurbita pepo metabolism throughout fruit development in acorn squash and oilseed pumpkin. Hortic Res 3, 16045.
Snail (Pomacea canaliculata)	Mollusca	Embryogenesis	transcriptome	intraspecific	N	NA	Xiong, Y., Hu, L., Yan, Z., Zhang, J., and Li, H. (2018). Transcriptomic analysis of embryo development in the invasive snail Pomacea canaliculata. J Mollus Stud 84, 233–239.
Trochozoans	Trochozoa	Early development	transcriptome	C. gigas, H. discus hannai, P. aibuhitensis	Y	Transcriptome Age Index, Transcriptome Polymorphism Index	Xu, F., Domazet-Lošo, T., Fan, D., Dunwell, T.L., Li, L., Fang, X., and Zhang, G. (2016). High expression of new genes in trochophore enlightening the ontogeny and evolution of trochozoans. Sci Rep 6, 34664.
Mahi mahi (Coryphaena hippurus)	Chordata	Mid embryo - larva	transcriptome	intraspecific	N	NA	Xu, E.G., Mager, E.M., Grosell, M., Stieglitz, J.D., Hazard, E.S., Hardiman, G., and Schlenk, D. (2017). Developmental transcriptomic analyses for mechanistic insights into critical pathways involved in embryogenesis of pelagic mahi-mahi (Coryphaena hippurus). PLoS ONE 12, e0180454.
Mammals	Chordata	Embryogenesis	transcriptome	H. sapiens, M. musculus	Y	Transcriptome expression	Xue, L., Cai, J.-Y., Ma, J., Huang, Z., Guo, M.-X., Fu, L.-Z., Shi, Y.-B., and Li, W.-X. (2013a). Global expression profiling reveals genetic programs underlying the developmental divergence between mouse and human embryogenesis. BMC Genomics 14, 568.
Mammals	Chordata	Early embryogenesis	single cell transcriptome	H. sapiens, M. musculus	Y	Transcriptome expression	Xue, Z., Huang, K., Cai, C., Cai, L., Jiang, C., Feng, Y., Liu, Z., Zeng, Q., Cheng, L., Sun, Y.E., et al. (2013b). Genetic programs in human and mouse early embryos revealed by single-cell RNA sequencing. Nature 500, 593–597.
Xenopus	Chordata	Embryogenesis	transcriptome	X. laevis - X. tropicalis	Y	Transcriptome expression	Yanai, I., Peshkin, L., Jorgensen, P., and Kirschner, M.W. (2011). Mapping gene expression in two Xenopus species: evolutionary constraints and developmental flexibility. Dev Cell 20, 483–496.
Whitefly (Bemisia tabaci)	Arthropoda	All ontogeny (3 stages)	transcriptome	intraspecific	N	NA	Yang, N., Xie, W., Jones, C.M., Bass, C., Jiao, X., Yang, X., Liu, B., Li, R., and Zhang, Y. (2013b). Transcriptome profiling of the whitefly Bemisia tabaci reveals stage‐specific gene expression signatures for thiamethoxam resistance. Insect Mol Biol 22, 485–496.
Danio rerio	Chordata	Embryo - Larva	transcriptome	intraspecific	N	NA	Yang, H., Zhou, Y., Gu, J., Xie, S., Xu, Y., Zhu, G., Wang, L., Huang, J., Ma, H., and Yao, J. (2013a). Deep mRNA sequencing analysis to capture the transcriptome landscape of zebrafish embryos and larvae. PLoS ONE 8, e64058.
Amphioxus (Branchiostoma belcheri)	Chordata	All ontogeny	transcriptome	intraspecific	N	NA	Yang, K.Y., Chen, Y., Zhang, Z., Ng, P.K.-S., Zhou, W.J., Zhang, Y., Liu, M., Chen, J., Mao, B., and Tsui, S.K.-W. (2016). Transcriptome analysis of different developmental stages of amphioxus reveals dynamic changes of distinct classes of genes during development. Sci Rep 6, 23195.
Melon (Cucumis melo L.)	Angiosperm	All ontogeny	transcriptome	intraspecific	N	NA	Yano, R., Nonaka, S., and Ezura, H. (2018). Melonet-DB, a grand RNA-seq gene expression atlas in melon (Cucumis melo L.). Plant Cell Physiol 59, e4(1-15).
Butterfly (Papilio polytes)	Arthropoda	All ontogeny (3 stages)	transcriptome	intraspecific	N	NA	Yao, S., Wang, Y., Tao, R., Su, C., and Hao, J. (2018). Preliminary analysis on the developmental transcriptomes of swallowtail butterfly Papilio polytes (Lepidoptera: Papilioidae). Genet Mol Res 17, gmr16039902.
Tomato (Solanum lycopersicum)	Angiosperm	Fruit development	transcriptome	intraspecific	N	NA	Ye, J., Hu, T., Yang, C., Li, H., Yang, M., Ijaz, R., Ye, Z., and Zhang, Y. (2015). Transcriptome profiling of tomato fruit development reveals transcription factors associated with ascorbic acid, carotenoid and flavonoid biosynthesis. PLoS ONE 10, e0130885.
Homo sapiens	Chordata	Mid embryogenesis	transcriptome	intraspecific	N	NA	Yi, H., Xue, L., Guo, M.-X., Ma, J., Zeng, Y., Wang, W., Cai, J.-Y., Hu, H.-M., Shu, H.-B., Shi, Y.-B., et al. (2010). Gene expression atlas for human embryogenesis. FASEB J 24, 3341–3350.
Mus musculus	Chordata	Oocyte - Blastocyst	transcriptome	intraspecific	N	NA	Zeng, F., Baldwin, D.A., and Schultz, R.M. (2004). Transcript profiling during preimplantation mouse development. Dev Biol 272, 483–496.
Homo sapiens	Chordata	Early embryogenesis	transcriptome	intraspecific	N	NA	Zhang, P., Zucchelli, M., Bruce, S., Hambiliki, F., Stavreus-Evers, A., Levkov, L., Skottman, H., Kerkelä, E., Kere, J., and Hovatta, O. (2009). Transcriptome profiling of human pre-implantation development. PLoS ONE 4, e7844.
Tomato (Solanum lycopersicum)	Angiosperm	Early fruit development	transcriptome	intraspecific	N	NA	Zhang, S., Xu, M., Qiu, Z., Wang, K., Du, Y., Gu, L., and Cui, X. (2016). Spatiotemporal transcriptome provides insights into early fruit development of tomato (Solanum lycopersicum). Sci Rep 6, 23173.
Yak (Bos grunniens)	Chordata	Early embryogenesis	transcriptome	intraspecific	N	NA	Zi, X., Luo, B., Xia, W., Zheng, Y., Xiong, X., Li, J., Zhong, J., Zhu, J., and Zhang, Z. (2018). Characterization of transcriptional complexity during pre‐implantation development of the yak (Bos grunniens) using RNA‐Seq. Reprod Domest Anim 53, 759–768.
